# Supplementary material for: Exposure to Sunlight Reduces the Risk of Myopia in Rhesus Monkeys
Source: PubMed Central journal article supplement (PMC4451516; doi:10.1371/journal.pone.0127863), 2015-06-01

# 中山大学中山眼科中心 动物实验伦理委员会审查报告

Ethics Committee review of animal experiments Zhongshan Ophthalmic Center, Sun Yat-sen University

|                           |                                  |                             |           |
|---------------------------|----------------------------------|-----------------------------|-----------|
| 实验名称<br>(Study title)     | 幼年恒河猴近视眼动物模型的建立及机制研究             |                             |           |
| 项目来源<br>(Project sources) | 国家自然科学基金                         |                             |           |
| 项目申请人<br>(Applicant)      | 丁辉                               | 受理编号<br>(Acceptance number) | 2010-019  |
| 审查形式<br>(Auditing)        | 会议/通讯<br>(Meeting/Communication) | 审查时间<br>(Processing time)   | 2010-6-30 |

实验动物管理和伦理委员会签名(Signature of Institutional Animal Care and Use/ Ethics Committee Members):

|     |                                                                   |     |
|-----|-------------------------------------------------------------------|-----|
| 葛 坚 | 中山大学中山眼科中心<br>Zhongshan Ophthalmic Center, Sun Yat-sen University |     |
| 王智崇 | 中山大学中山眼科中心<br>Zhongshan Ophthalmic Center, Sun Yat-sen University |     |
| 吴开力 | 中山大学中山眼科中心<br>Zhongshan Ophthalmic Center, Sun Yat-sen University |     |
| 张清炯 | 中山大学中山眼科中心<br>Zhongshan Ophthalmic Center, Sun Yat-sen University | 张清炯 |
| 张秀兰 | 中山大学中山眼科中心<br>Zhongshan Ophthalmic Center, Sun Yat-sen University |     |
| 李永平 | 中山大学中山眼科中心<br>Zhongshan Ophthalmic Center, Sun Yat-sen University | 李永平 |
| 钟兴武 | 中山大学中山眼科中心<br>Zhongshan Ophthalmic Center, Sun Yat-sen University | 钟兴武 |
| 黄 韧 | 广东省实验动物监测所<br>Guangdong Laboratory Animals Monitoring Institute   |     |
| 黄 冰 | 中山大学中山眼科中心<br>Zhongshan Ophthalmic Center, Sun Yat-sen University | 黄冰  |
| 刘利鸽 | 中山大学中山眼科中心<br>Zhongshan Ophthalmic Center, Sun Yat-sen University | 刘利鸽 |
| 黎韦华 | 中山大学中山眼科中心<br>Zhongshan Ophthalmic Center, Sun Yat-sen University | 黎韦华 |

审查结果(Results of the review):

该实验方案符合动物福利伦理要求, 通过动物实验伦理审查, 准予开展动物实验。

中山眼科中心实验动物管理和伦理委员会  
Institutional Animal Care and Use/ Ethics Committee Zhongshan Ophthalmic Center

伦理委员会主任委员签章 (Signature of Ethics Committee Director):

时 间(time): 2010.6.30

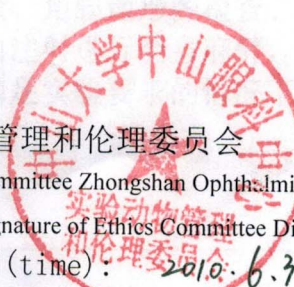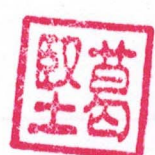

Supplement: pone.0127863.s001.pdf [file pone.0127863.s001.pdf]
