# Supplementary material for: Exposure to Sunlight Reduces the Risk of Myopia in Rhesus Monkeys
Source: PubMed Central journal article supplement (PMC4451516; doi:10.1371/journal.pone.0127863), 2015-06-01
Supplement: pone.0127863.s002.pdf [file pone.0127863.s002.pdf]

# 国家重点保护野生动物 驯养繁殖许可证

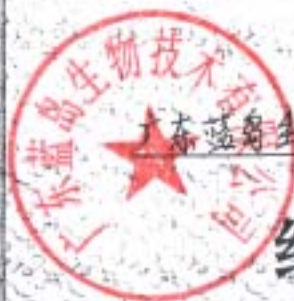

青岛生物技术有限公司

鲁发 驯繁(2009-001-)号

经审核，允许驯养繁殖国家重点保护野生动物，特发此证。

(准许驯养繁殖种类见副本)

发证机关

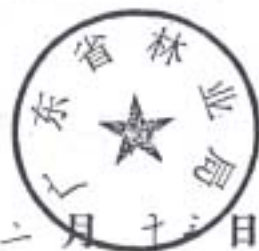

二〇〇九年二月十日
