# Supplementary material for: Exposure to Sunlight Reduces the Risk of Myopia in Rhesus Monkeys
Source: PubMed Central journal article supplement (PMC4451516; doi:10.1371/journal.pone.0127863), 2015-06-01
Supplement: pone.0127863.s004.pdf [file pone.0127863.s004.pdf]

# 实验动物生产许可证

许可证号 SCXK(粤)2014-0010

单位名称：广东蓝岛生物技术有限公司

法定代表人：韩日畴

设施地址：广州市萝岗区九龙镇红卫广华路 33 号

适用范围：普通级（食蟹猴、猕猴，9971 m<sup>2</sup>）

有效期五年

发证机关：广东省科学技术厅

二〇一四年六月十日
