# Supplementary material for: Exposure to Sunlight Reduces the Risk of Myopia in Rhesus Monkeys
Source: PubMed Central journal article supplement (PMC4451516; doi:10.1371/journal.pone.0127863), 2015-06-01

# 实验动物使用许可证

许可证号:SYXK(粤)2013-0088

单位名称:广东蓝岛生物技术有限公司

法定代表人:韩日畴

设施地址:广州市萝岗区九龙镇红卫广华路33号

适用范围:普通环境(猴、400m<sup>2</sup>)

有效期五年

发证机关:广东省科学技术厅

二〇一三年五月二十一日

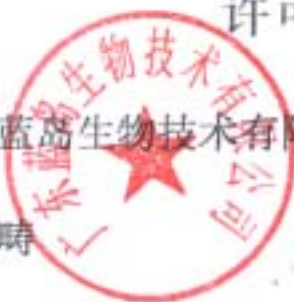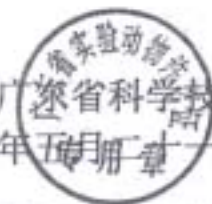

Supplement: pone.0127863.s005.pdf [file pone.0127863.s005.pdf]
